# Supplementary material
Source: MDPI journal article supplement (https://www.mdpi.com/2073-4441/14/21/3353)
Supplement: s1 [file s1 › water-1904501-supplementary.pdf]

---

*Supplementary materials for*

**Efficiency Determination and Mechanism  
Investigation of Autotrophic Denitrification  
Strain F1 to Promote Low-Carbon Development**

**Fang-Kai Qin <sup>1,2</sup>, Si-Zhuo Wan <sup>1</sup>, Bing-Yin Liu <sup>1</sup>, Ru Wang <sup>1,\*</sup> and Ping Zheng <sup>3</sup>**

<sup>1</sup> Shaanxi Key Lab of Environmental Engineering, Xi'an University of Architecture and Technology, Xi'an 710055, China

<sup>2</sup> XAUAT UniSA An De College, Xi'an University of Architecture and Technology, Xi'an 710055, China

<sup>3</sup> Department of Environmental Engineering, College of Environmental & Resource Science, Zhejiang University, Yuhangtang Road 866, Hangzhou 310058, China

\* Correspondence: r.wang@xauat.edu.cn

**Figure S1**

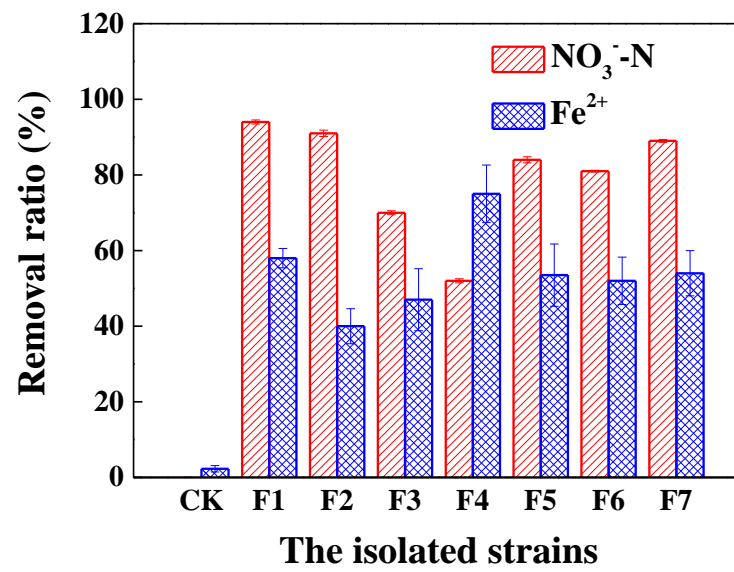

Figure S1 The nitrate and ferrous ion removal efficiency of seven isolated strains from the lab-scale reactor.

**Figure S2**

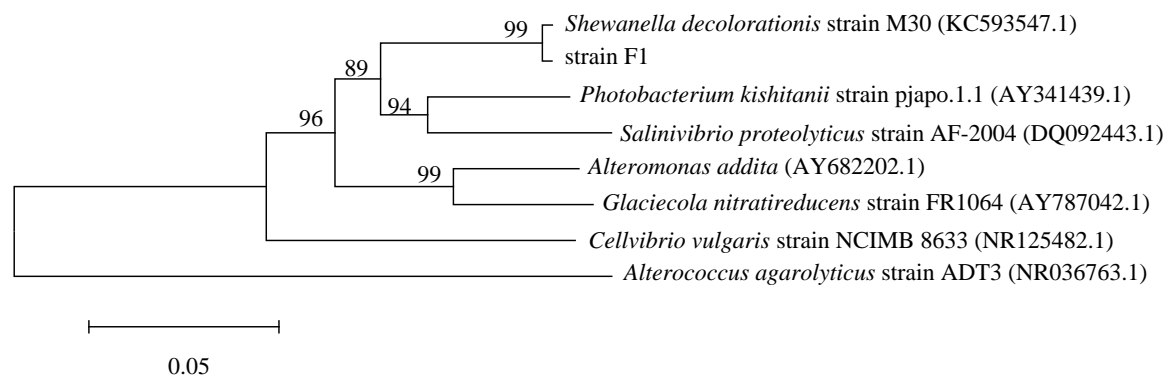

Figure S2 Phylogenetic tree of strain F1. Numbers in parentheses represent the sequences' accession number in GenBank. The number at each branch points is the percentage supported by bootstrap (1000 re-samplings). Bar: 0.5 % sequence divergence.

---

**Figure S3**

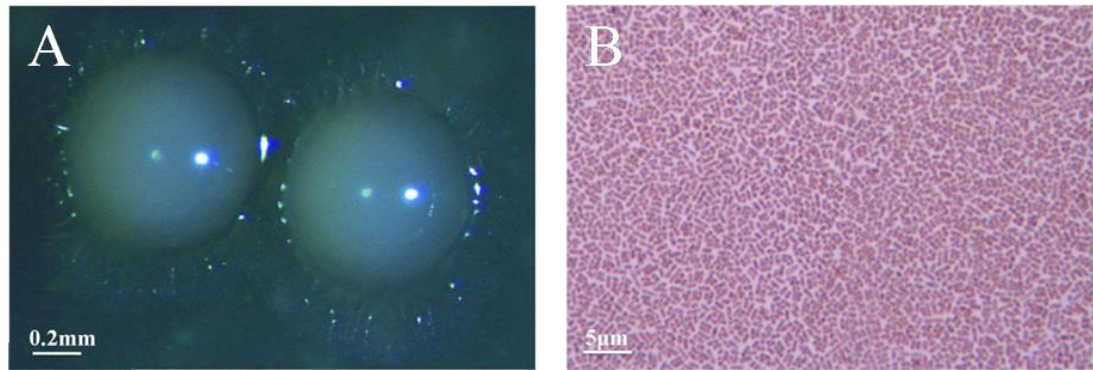

Figure S3 Morphological characteristics of strain F1. A: colony morphology by the stereoscope; B: Gram stain observed by the optical microscope;.
